# Supplementary material for: High Glucose Reduces the Paracellular Permeability of the Submandibular Gland Epithelium via the MiR-22-3p/Sp1/Claudin Pathway
Source: MDPI journal article supplement (doi:10.3390/cells10113230), 2021-11-19
Supplement: s1 [file s1]

**Table S1. Information of the patients**

| Patient | Gender | Age (years) | Disease        |
|---------|--------|-------------|----------------|
| P1      | Female | 46          | Mandible tumor |
| P2      | Male   | 69          | Tongue SCC     |
| P3      | Male   | 62          | Buccal SCC     |
| P4      | Female | 67          | Gingiva SCC    |
| P5      | Male   | 75          | Gingiva SCC    |
| P6      | Male   | 38          | Tongue SCC     |
| P7      | Male   | 74          | Buccal SCC     |
| P8      | Male   | 68          | Mandible tumor |
| P9      | Male   | 67          | Gingiva SCC    |
| P10     | Female | 43          | Tongue SCC     |

SCC, squamous cell carcinoma.

**Table S2. Information of primary antibodies**

| Antibodies           | Catalog   | Source                    | Dilution                  |
|----------------------|-----------|---------------------------|---------------------------|
| Anti-claudin-1       | BS1063    | Bioworld Technology       | 1:1,000 (WB), 1:100 (IHC) |
| Anti-claudin-3       | BS1067    | Bioworld Technology       | 1:1,000 (WB), 1:100 (IHC) |
| Anti-claudin-4       | BS1068    | Bioworld Technology       | 1:1,000 (WB), 1:100 (IF)  |
| Anti-claudin-7       | BS1070    | Bioworld Technology       | 1:1,000 (WB)              |
| Anti-claudin-10      | 38-8400   | Thermo Fisher Scientific  | 1:1,000 (WB)              |
| Anti-Sp1             | ab13370   | Abcam                     | 1:200 (ChIP)              |
| Anti-Sp1             | NB600-233 | NOVUS Biologicals         | 1:10,000 (WB)             |
| Anti- $\beta$ -actin | #4970     | Cell Signaling Technology | 1:1,000 (WB)              |

Sp1, specificity protein-1; WB, western blot; IHC, immunohistochemistry; IF, immunofluorescence; ChIP, chromatin immunoprecipitation.

**Table S3. Primers sequences used in RT-PCR**

| Gene           | Forward primer (5'-3')   | Reverse primer (5'-3')   |
|----------------|--------------------------|--------------------------|
| Mouse          |                          |                          |
| Claudin-1      | GACAGGAGCAGGAAAGTAGGA    | CTTTGGAATTAGGCAGAACGA    |
| Claudin-2      | CCATGGCCTCCCTTGGCGTCC    | CACACATACCCAGTCAGGCTG    |
| Claudin-3      | TTTCTTTGTCCATTCGGCTTG    | ACCGTACCGTCACCACTACCA    |
| Claudin-4      | GATCTTGGCCTTGACGGTCTC    | CTCTGGATGAACTGCGTGGTG    |
| Claudin-5      | CCATGGGGTCTGCAGCGTTGG    | GGCGAACCAGCAGAGCGGCAC    |
| Claudin-7      | CCATGGCCAACTCGGGCCTGCAAC | TCACACGTATTCCTTGGAGG     |
| Claudin-10     | CCATGGGTAGCACGGCCTTGG    | TTAGACATAGGCATTTTATC     |
| Sp1            | TCCACCTGCTGTCTCATC       | TACCACCCTAACACCCAT       |
| $\beta$ -actin | CCAACCGTGAAAAGATGACC     | CCAGAGGCATACAGGGACAG     |
| Human          |                          |                          |
| Claudin-1      | GCAGAAGATGAGGATGGCTGT    | CCTTGGTGTTGGGTAAGAGGT    |
| Claudin-3      | GGACTTCTACAACCCCGTGGT    | AGACGTAGTCCTTGCGGTCTGT   |
| Claudin-4      | CAAGGCCAAGACCATGATCGT    | GCGGAGTAAGGCTTGTCTGTG    |
| Claudin-7      | CTCGAGCCCTAATGGTGGTCT    | CCCAGGACAGGAACAGGAGAG    |
| Sp1            | AGACAGTGAAGGAAGGGGCT     | GCGTTTCCCACAGTATGACC     |
| $\beta$ -actin | CTACCTCATGAAGATCCTCACCGA | TTCTCCTTAATGTCACGCACGATT |
| Rat            |                          |                          |
| Claudin-1      | CATCATCTTCTAAGCACCTCA    | GGGACAACATCGTGACTG       |
| Claudin-3      | TCTTGGCCTTGGCCGTCT       | TCTATCCTACTGGCAGCCTTCG   |
| Sp1            | GGACAGTTGAGCAGCATT       | CCATCATCATTGGGACAC       |
| $\beta$ -actin | CCCATCTATGAGGGTTACGC     | TTTAATGTCACGCACGATTTC    |

Sp1, specificity protein-1.

**Table S4. Sequences of claudin-1 and -3 shRNA**

| Gene            | Sequence (5'-3')              |
|-----------------|-------------------------------|
| Claudin-1 shRNA | ACCAGAGCCTTGATGGTAATTGGCATCCT |
| Claudin-3 shRNA | CTCTCATCGTGGTGTCTATCCTACTGGCA |

**Table S5. Sequences of Sp1 siRNA**

| Gene          | Forward sequence (5'-3') | Reverse sequence (5'-3') |
|---------------|--------------------------|--------------------------|
| rno-Sp1-siRNA | GCAAGUUCUGACAGGUCUATT    | UAGACCUGUCAGAACUUGCTT    |
| NC siRNA      | UUCUCCGAACGUGUCACGUdTdT  | ACGUGACACGUUCGGAGAAdTdT  |
| PC siRNA      | CCCUCACAAGAGGAUUGAAdTdT  | UUCAAUCCUCUUGUGAGGGdTdT  |

Sp1, specificity protein-1; NC, negative control; PC, positive control.

**Table S6. Primers sequences of claudin-1 promoter fragments**

| Target sequence<br>(bp) | Sequence                 |                        | Amplicon<br>(bp) |
|-------------------------|--------------------------|------------------------|------------------|
|                         | Forward primer (5'-3')   | Reverse primer (5'-3') |                  |
| -400 to -283            | CTAGACAGGATTAGGCTGTCGAGG | GTTGTGCCTTAGGACCCATTCT | 201              |
| -284 to -84             | ATTGGCCACGAAACCACCA      | AGCCAGGAGGTTAGCGCTGA   | 200              |
| -87 to 110              | CTGAGACTCCATCACCTTCGG    | CCAGCATAGGAGTAAATCTTCC | 197              |
| 111 to 315              | GGACAACATCGTGACTGCTCAG   | GCTACTACAGAGGACAAGGGCT | 204              |

**Table S7. Primers sequences of claudin-3 promoter fragments**

| Target sequence<br>(bp) | Sequence               |                        | Amplicon<br>(bp) |
|-------------------------|------------------------|------------------------|------------------|
|                         | Forward primer (5'-3') | Reverse primer (5'-3') |                  |
| -1677 to -1480          | TCGATGAGGTGCCTACTGACAT | CTTGGGGTCCTTTCTTCACCAG | 197              |
| -739 to -562            | GGTGCTACATTTCCATCCACC  | TGAAGTGCAAATCACCAATTG  | 177              |
| -364 to -146            | GTGAAGAGGGTTGGGGAGTAC  | CACGCTAACGGCTCCTTTCC   | 218              |
| -147 to 52              | CTCCGTCCATTGCCATCC     | CACACGATGGTGACAGC      | 199              |
| 53 to 199               | TGTGCACCATCGTGTGCT     | CAGCGAGTCGTACATCTTGC   | 146              |
| 200 to 396              | ACTCGCTGCTGGCCCTGC     | TAAGGTGAGCACAGCCGC     | 196              |

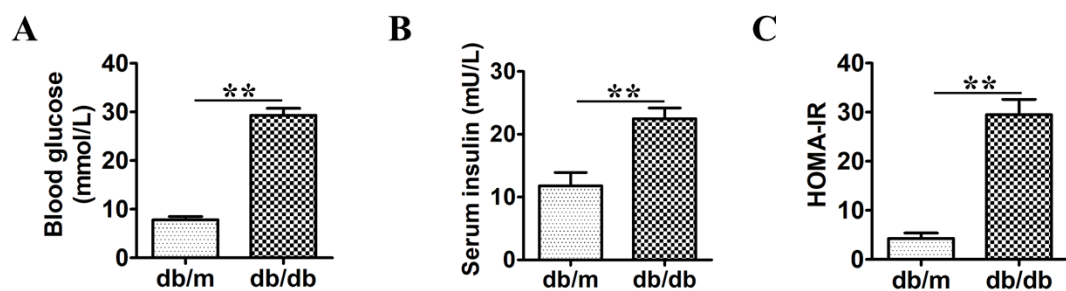

**Figure S1.** Confirmation of diabetes in db/db mice. **(A)** Blood glucose levels of db/m and db/db mice. **(B)** Serum insulin levels of db/m and db/db mice. **(C)** Insulin resistance index (HOMA-IR) of db/m and db/db mice.  $n = 5$ ,  $**p < 0.01$ .



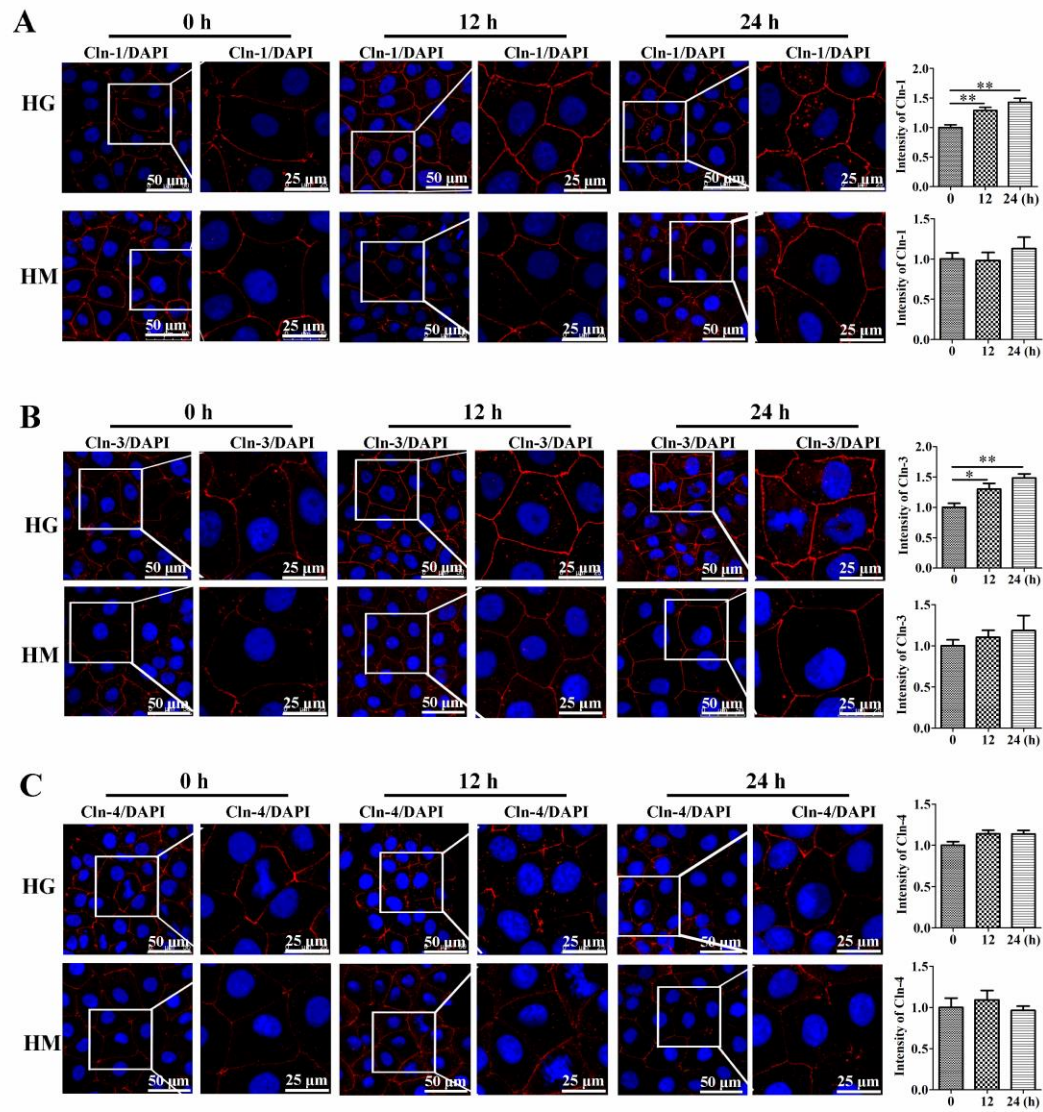

**Figure S2.** Immunofluorescence staining of claudin-1(Cln-1) (A), Cln-3 (B) and Cln-4 (C) in high glucose (HG) and high mannitol (HM)-treated SMG-C6 cells.

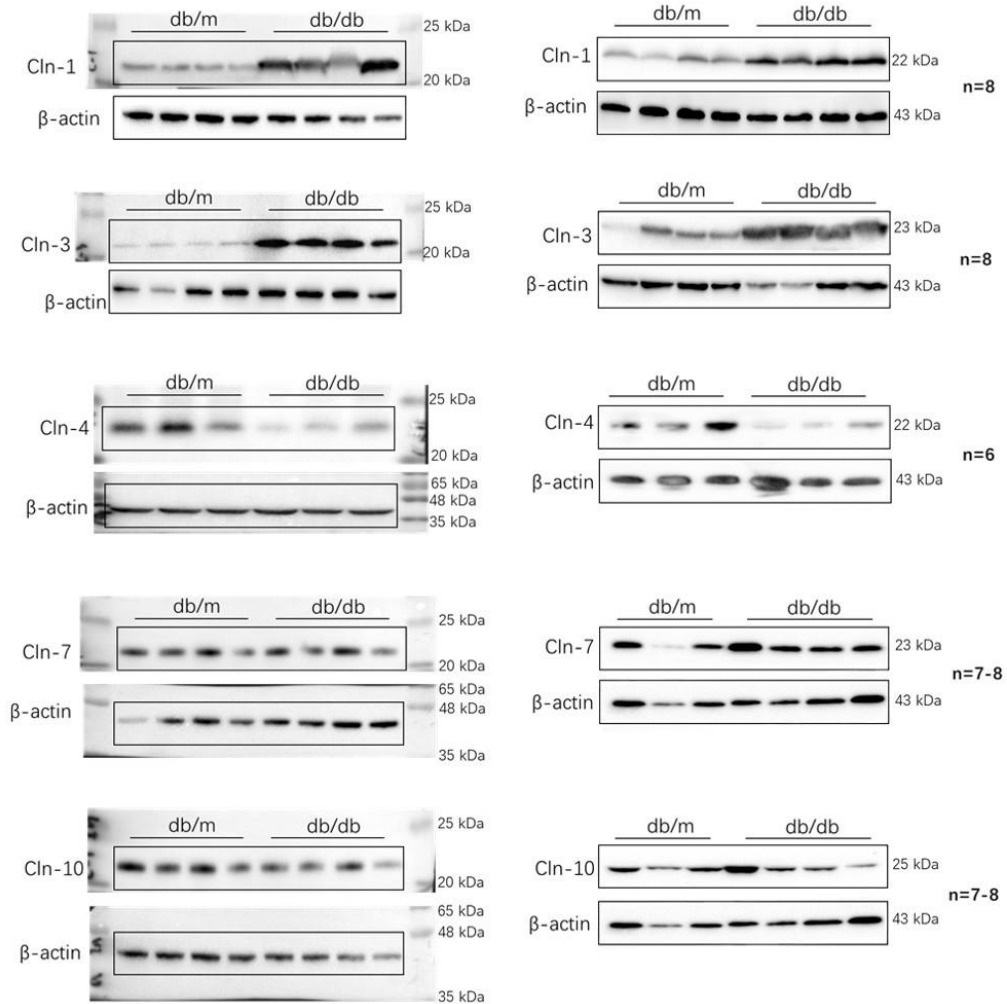

**Figure S3.** All western blot bands of claudin-1 (Cln-1), Cln-3, Cln-4, Cln-7, and Cln-10 in mouse SMGs.

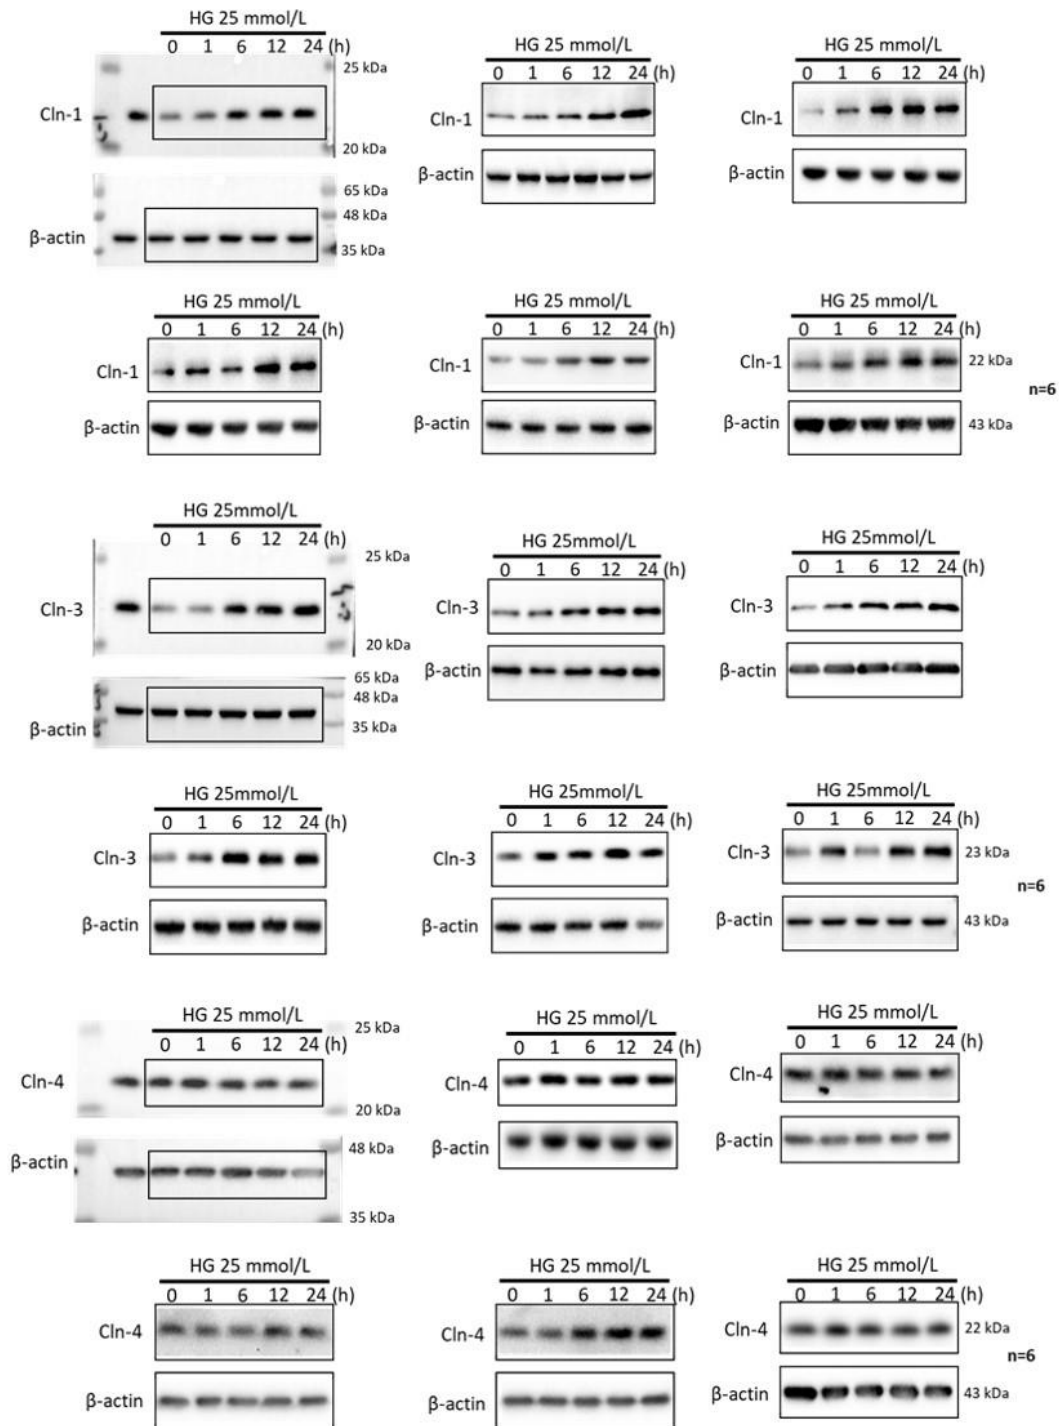

**Figure S4.** All western blot bands of claudin-1 (Cln-1), Cln-3, and Cln-4 in high glucose (HG = 25 mmol/L)-treated SMG-C6 cells.

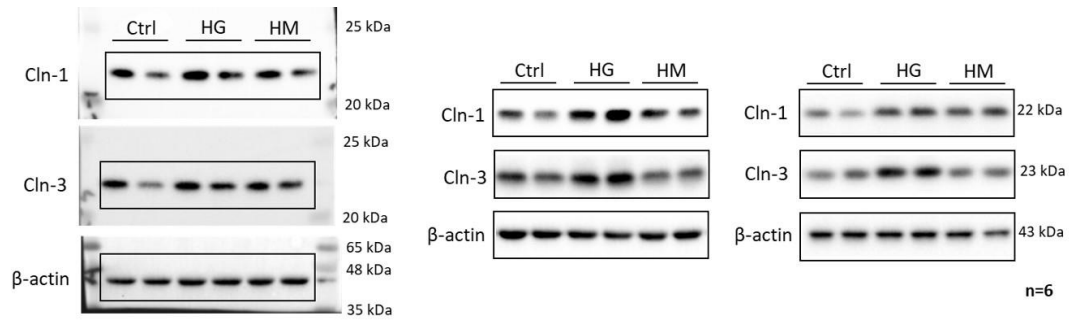

**Figure S5.** All western blot bands of claudin-1 (Cln-1) and Cln-3 in the control (Ctrl), high glucose (HG = 25 mmol/L), and high mannitol (HM = 25 mmol/L) groups.

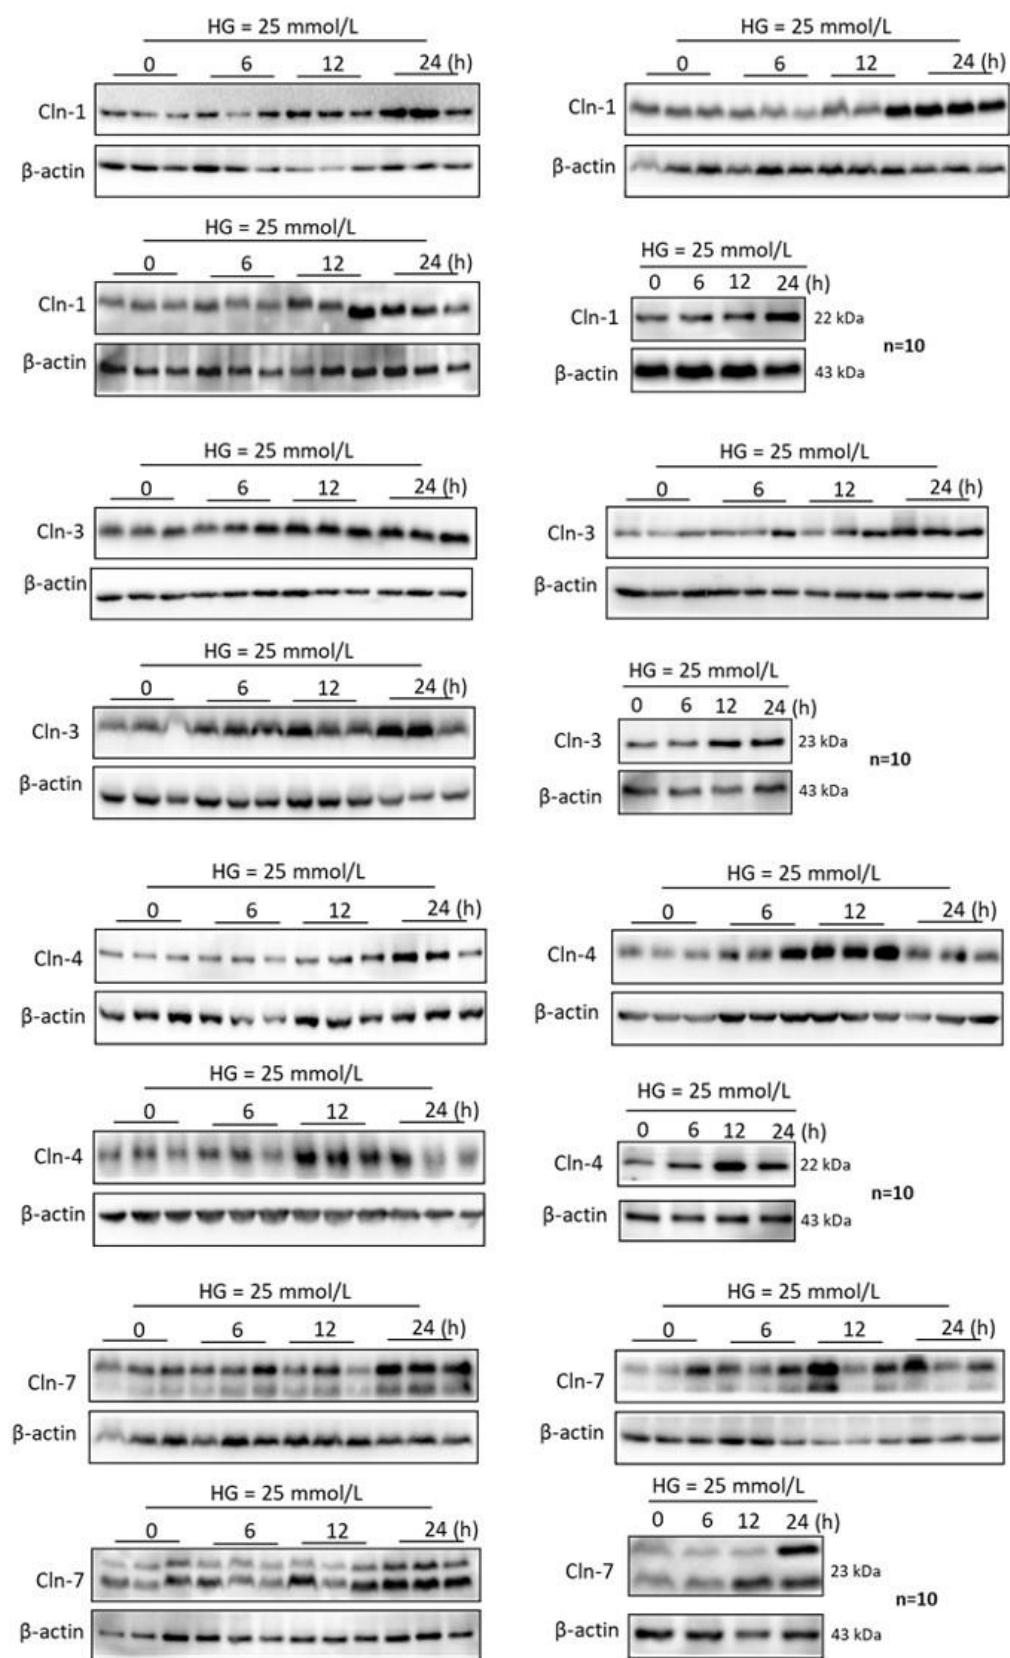

**Figure S6.** All western blot bands of claudin-1 (Cln-1), Cln-3, Cln-4, and Cln-7 in high glucose (HG = 25 mmol/L)-treated human SMGs.

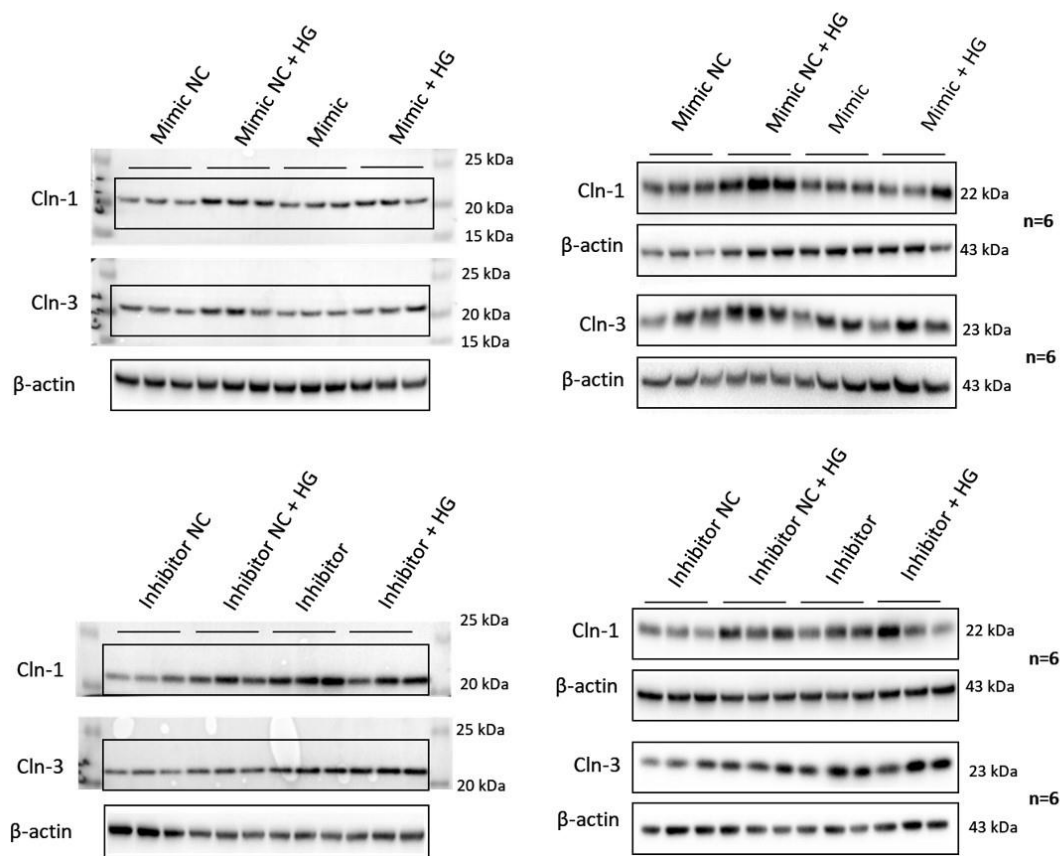

**Figure S7.** All western blot bands of Cln-1 and Cln-3 after transfecting SMG-C6 cells with the miR-22-3p mimic or inhibitor. NC, negative control; HG, high glucose.

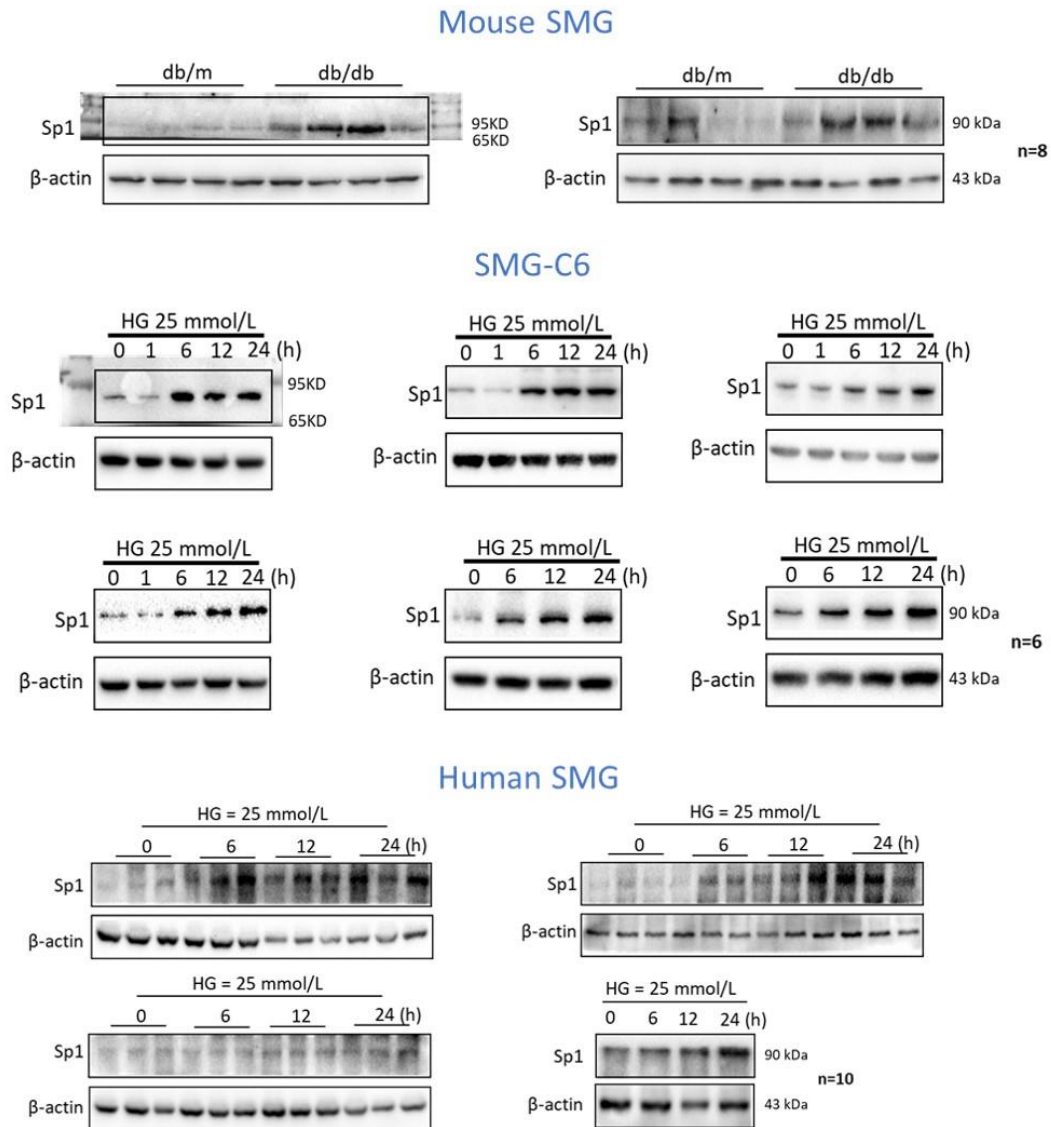

**Figure S8.** All western blot bands of Sp1 in mouse SMGs, high glucose (HG = 25 mmol/L)-treated SMG-C6 cells, and HG-treated human SMGs.

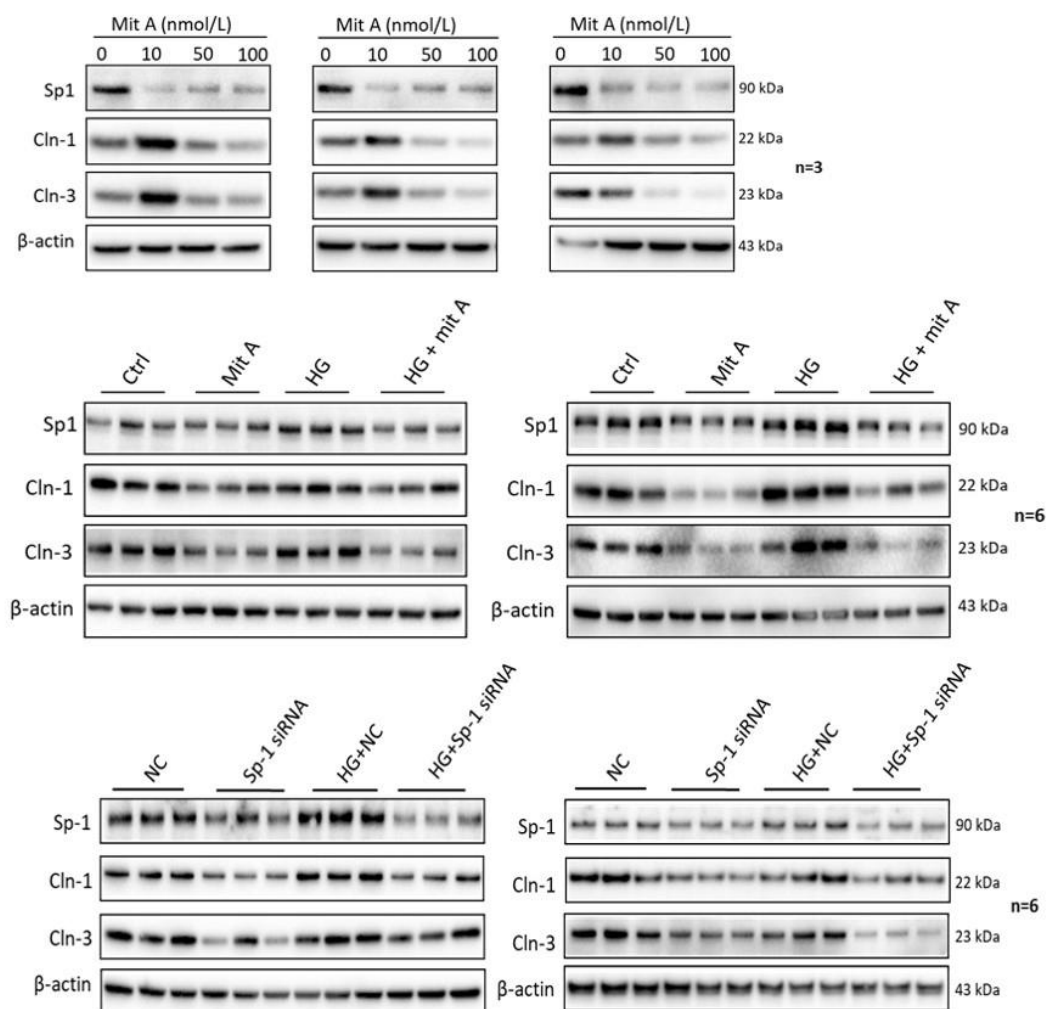

**Figure S9.** All western blot bands of Sp1, Cln-1 and Cln-3 after incubating SMG-C6 cells with Sp1 inhibitor mithramycin A (mitA) or transfecting SMG-C6 cells with Sp1-specific siRNA. Ctrl, control; NC, negative control; HG, high glucose.



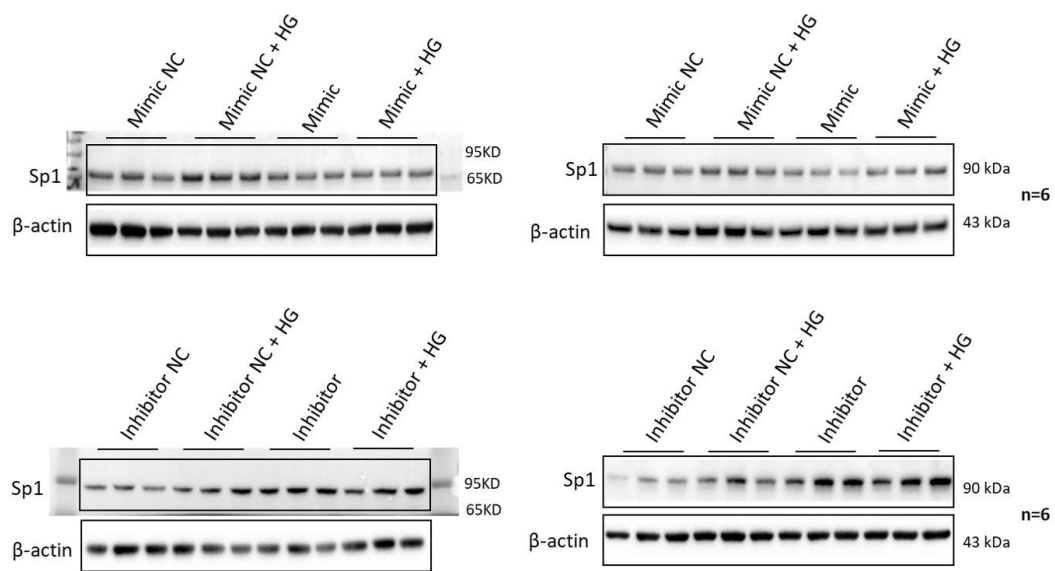

**Figure S10.** All western blot bands of Sp1 after transfecting SMG-C6 cells with the miR-22-3p mimic or inhibitor.
